# Supplementary material
Source: publisher figshare collection journal article supplement (https://frontiersin.figshare.com/ndownloader/files/26573597)
Supplement: Supplementary file 1 [file 26573597]

Supplement Table 2. A list of elasmobranchs used in the present study

| **Order** | **Family** | **Scientific name** | **Common name** |
| --- | --- | --- | --- |
| Orectolobiformes | Hemiscylliidae | *Chiloscyllium plagiosum* | Whitespotted Bamboo Shark |
|  | Rhincodontidae | *Rhincodon typus* | Whale shark |
| Lamniformes | Odontaspididae | *Odontaspis taurus* | Sand tiger shark |
|  | Alopiidae | *Alopias pelagicus* | Pelagic thresher shark |
|  | *Lamnidae* | *Isurus oxyrinchus* | *Shortfin mako shark* |
| Carcharhiniformes | Triakidae | *Galeorhinus galeus* | School shark |
|  |  | *Mustelus antarcticus* | Gummy shark |
|  |  | *M. griseus* | Smooth dogfish |
|  | Carcharhinidae | *Carcharhinus acronotus* | Blacknose shark |
|  |  | *C. brevipinna* | Spinner shark |
|  |  | *C. falciformis* | Silky shark |
|  |  | *C. isodon* | Finetooth shark |
|  |  | *C. leucas* | Bull Shark |
|  |  | *C. limbatus* | Blacktip shark |
|  |  | *C. longimanus* | Oceanic whitetip shark |
|  |  | *C. obscurus* | Dusky shark |
|  |  | *C. plumbeus* | Sandbar shark |
|  |  | *C. porosus* | Smalltail shark |
|  |  | *C. signatus* | Night shark |
|  |  | *Galeocerdo cuvier* | Tiger shark |
|  |  | *Isogomphodon oxyrhynchus* | Daggernose shark |
|  |  | *Prionace glauca* | Blue shark |
|  |  | *Rhizoprionodon terraenovae* | Atlantic sharpnose shark |
|  | Sphyrnidae | *Sphyrna lewini* | Scalloped hammerhead shark |
| Squaliformes | Etmopteridae | *Etmopterus pusillus* | Smooth lantern shark |
|  |  | *E. spinax* | Deepwater lantern shark |
| Rajiformes | Rhinobatidae | *Rhinobatos rhinobatos* | Common guitarfish |
|  | Rajidae | *Amblyraja radiata* | Thorny skate |
|  |  | *Leucoraja ocellata* | Winter skate |
|  |  | *L. erinacea* | Little skate |
|  |  | *L. naevus* | Cuckoo ray |
|  |  | *Dipturus batis* | Blue skate |
|  |  | *D. chilensis* | Yellownose skate |
|  |  | *D. kwangtungensis* | Kwangtung skate |
|  |  | *Raja undulata* | Undulate ray |
|  |  | *Rostroraja texana* | Roundel skate |
|  |  | *Okamejei acutispina* | Sharpspine skate |
| Myliobatiformes | Dasyatidae | *Dasyatis pastinaca* | Common stingray |
